# Supplementary material
Source: publisher site journal article supplement (http://kjim.org/upload/media/kjim-2018-170-suppl1.pdf)
Supplement: Supplementary file 1 [file kjim-2018-170-suppl1.pdf]

**Supplementary Table 1. Annual medical costs of access-related treatments (2008 to 2016)**

| Year | Venography    | Fistulogra-<br>phy | PTA            | Stent<br>placement | Percutaneous<br>thrombecto-<br>my | AVF<br>placement | AVG<br>placement | Surgical<br>revision | Removal of<br>infected graft | TDC<br>placement | Total          | Hemodialysis<br>patients |
|------|---------------|--------------------|----------------|--------------------|-----------------------------------|------------------|------------------|----------------------|------------------------------|------------------|----------------|--------------------------|
| 2008 | 522,935,396   | 572,911,841        | 1,299,192,268  | 99,704,189         | 269,522,877                       | 2,278,051,187    | 838,748,301      | 976,201,617          | 9,262,272                    | 254,331,545      | 7,120,861,493  | 49,403                   |
| 2009 | 715,015,482   | 734,651,737        | 1,725,793,234  | 195,197,621        | 421,073,968                       | 2,563,602,288    | 981,407,077      | 1,423,702,347        | 44,981,066                   | 361,128,138      | 9,166,462,958  | 53,320                   |
| 2010 | 914,927,475   | 1,086,759,977      | 2,678,060,261  | 384,412,174        | 618,460,691                       | 3,064,825,887    | 1,290,403,807    | 1,640,332,825        | 70,113,602                   | 484,629,683      | 12,232,926,382 | 54,639                   |
| 2011 | 1,131,237,558 | 1,714,987,211      | 4,432,388,670  | 493,395,529        | 1,013,930,101                     | 3,183,966,474    | 1,292,724,787    | 1,651,471,114        | 93,331,311                   | 675,075,199      | 15,682,507,954 | 59,407                   |
| 2012 | 1,290,896,865 | 2,367,700,610      | 6,474,156,555  | 758,460,920        | 1,340,842,379                     | 3,206,149,884    | 1,293,858,345    | 1,937,702,728        | 79,796,241                   | 774,211,450      | 19,533,775,977 | 63,151                   |
| 2013 | 1,362,021,541 | 2,895,693,073      | 8,166,938,620  | 657,338,266        | 1,348,678,827                     | 3,410,929,755    | 1,349,600,156    | 2,166,892,066        | 94,312,612                   | 876,048,384      | 22,328,453,300 | 66,628                   |
| 2014 | 1,565,656,847 | 3,406,756,725      | 11,172,858,075 | 857,400,363        | 1,940,112,678                     | 4,077,277,591    | 1,645,631,739    | 2,776,136,577        | 161,224,277                  | 1,005,357,738    | 28,608,412,610 | 70,439                   |
| 2015 | 1,569,444,627 | 4,011,856,971      | 14,305,036,227 | 1,166,233,187      | 2,540,305,836                     | 5,371,920,157    | 2,139,596,382    | 3,616,648,524        | 179,641,470                  | 1,208,724,170    | 36,109,407,551 | 73,186                   |
| 2016 | 1,727,769,674 | 4,807,563,065      | 17,020,867,528 | 1,528,089,419      | 3,296,837,120                     | 5,610,011,733    | 2,630,257,918    | 3,905,180,861        | 205,245,897                  | 1,392,749,532    | 42,124,572,767 | 77,933                   |

PTA, percutaneous transluminal angioplasty; AVF, arteriovenous fistula; AVG, arteriovenous graft; TDC, tunneled dialysis catheter.
